# Supplementary material for: YUCCA9-Mediated Auxin Biosynthesis and Polar Auxin Transport Synergistically Regulate Regeneration of Root Systems Following Root Cutting
Source: PubMed Central journal article supplement (PMC5921505; doi:10.1093/pcp/pcx107), 2017-09-01
Supplement: pcp-2017-e-00176-file011_pcx107.pdf [file pcp-2017-e-00176-file011_pcx107.pdf]

Supplementary data

Supplementary Table S1

LR number in auxin signaling mutants

| Genotype            | Intact plants | Root-cut plants |
|---------------------|---------------|-----------------|
| wild-type (WT)      | 4.7±0.3       | 7.0±0.3         |
| <i>tir1-1afb2-3</i> | 2.2±0.2       | 4.3±0.3         |
| <i>arf6-1arf8-2</i> | 1.1±0.3       | 8.7±0.5         |

LR number within the 12 mm area from the root-shoot junction was counted. Results were indicated by mean ± SE, n = 10.

## Supplementary Table S2

## Gene-specific primers used for qRT-PCR analysis

| Gene name        | Primer name  | Primer Sequence (5'-3')         | Reference        |
|------------------|--------------|---------------------------------|------------------|
| <i>ACTIN2</i>    | ACTIN2-27S   | 5'-CGCTCTTTCTTTCCAAGCTCATA-3'   | Muto et al. 2007 |
|                  | ACTIN2+55AS  | 5'-CCATACCGGTACCATTGTCCACA-3'   |                  |
| <i>IAA19</i>     | IAA19+390S   | 5'-CTTCGGTTTCCGTGGCATCG-3'      | This study       |
|                  | IAA19+521AS  | 5'-CATGACTCTAGAAACATCCC-3'      |                  |
| <i>ARF19</i>     | ARF19+2988S  | 5'-ACAGCTCGAAGATCCGCTAACC-3'    | This study       |
|                  | ARF19+3098AS | 5'-TGCACGCAGTTCACAAACTCTTC-3'   |                  |
| <i>LBD16</i>     | LBD16+197S   | 5'-TCCATGATCGATGTGAAGCTGTGCG-3' | This study       |
|                  | LBD16+323AS  | 5'-TGTGATTGCAAGAAAGCCACCTG-3'   |                  |
| <i>LBD18</i>     | LBD18+274S   | 5'-TCCGATGCTGTGCGTAACAATTTGC-3' | This study       |
|                  | LBD18+390AS  | 5'-TTCTGCCTGTAGATTCACCACCTG-3'  |                  |
| <i>LBD29</i>     | LBD29+274S   | 5'-GCAAAAATCATGCTTTGTGCTGCT-3'  | Blacha 2009      |
|                  | LBD29+356AS  | 5'-TTTGTCTCCAACAACAGGTTGTG-3'   |                  |
| <i>PIN1</i>      | PIN1+1546S   | 5'-GGCATGGCTATGTTTCAGTCTTGGG-3' | This study       |
|                  | PIN1+1661AS  | 5'-ACGGCAGGTCCAACGACAAATC-3'    |                  |
| <i>PIN3</i>      | PIN3+1154S   | 5'-AAGGCGGAAGATCTGACCAAGG-3'    | This study       |
|                  | PIN3+1248AS  | 5'-TGCTGGATGAGCTACAGCTTTG-3'    |                  |
| <i>PIN7</i>      | PIN7+1699S   | 5'-CGTGTGGCCATTGTTCAAGCTG-3'    | This study       |
|                  | PIN7+1794AS  | 5'-CCCTGTACTCAAGATTGCGGGATG-3'  |                  |
| <i>YUC9</i>      | YUC9+542S    | 5'-ATAAGTCCGGCGAGAAATTCAGAG-3'  | This study       |
|                  | YUC9+682AS   | 5'-TCGGTAAAACATGAACCGAG-3'      |                  |
| <i>TAA1/SAV3</i> | TAA1+67S     | 5'-TTCGTGGTCAATCTGGATCATGG-3'   | This study       |
|                  | TAA1+156AS   | 5'-ACCACGTATCGTCACCGTACAC-3'    |                  |

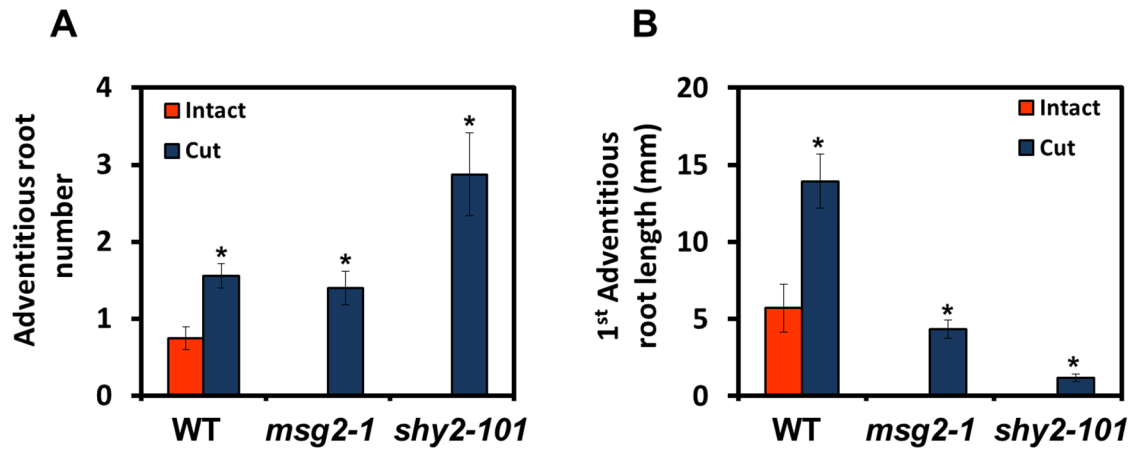

Supplementary Fig. S1. Root cutting increased adventitious root number and length.

Four-day-old plants were transferred to new medium and incubated for 1 d before root cutting.

The number of adventitious roots was counted (A) and the length of 1<sup>st</sup> adventitious root was measured (B) at 4 d after root cutting. Error bars indicate the SE (n=16). \*Significant differences compared with intact plants (Student's *t* test,  $P < 0.05$ ).

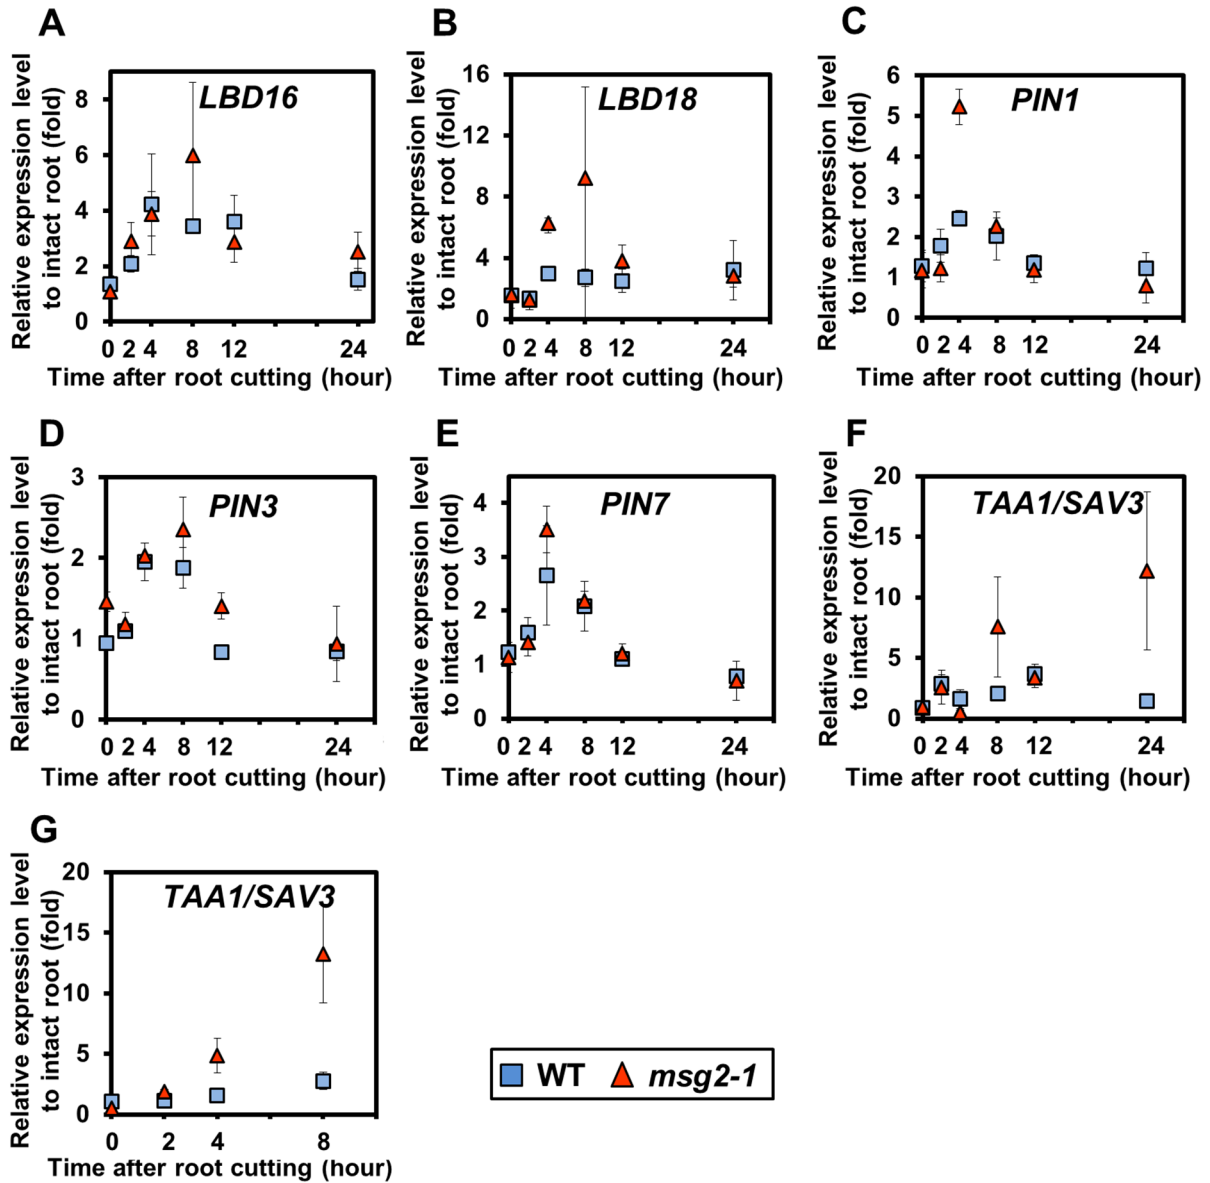

Supplementary Fig. S2. Changes of the relative expression level of LR formation-related genes (*LBD16* and *LBD18*), auxin transport genes (*PIN1*, *PIN3*, and *PIN7*), and auxin biosynthesis gene (*TAA1/SAV3*) in response to root cutting.

(A–F) RNA was extracted from 0–11 mm from the cut end. (G) RNA was extracted from 0–2.5 mm from the cut end. Error bars indicate SE from three independent biological replicates.

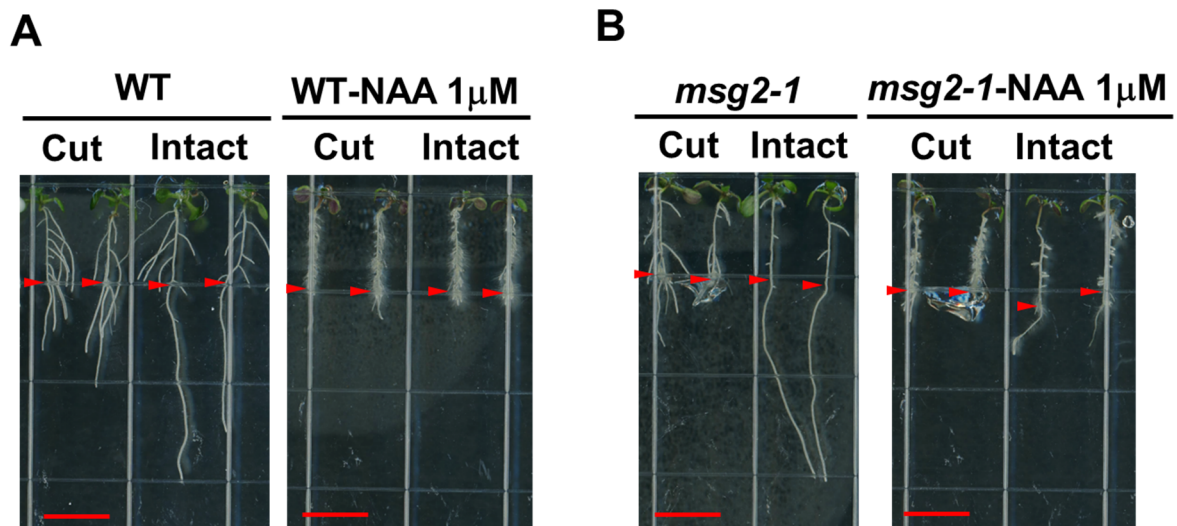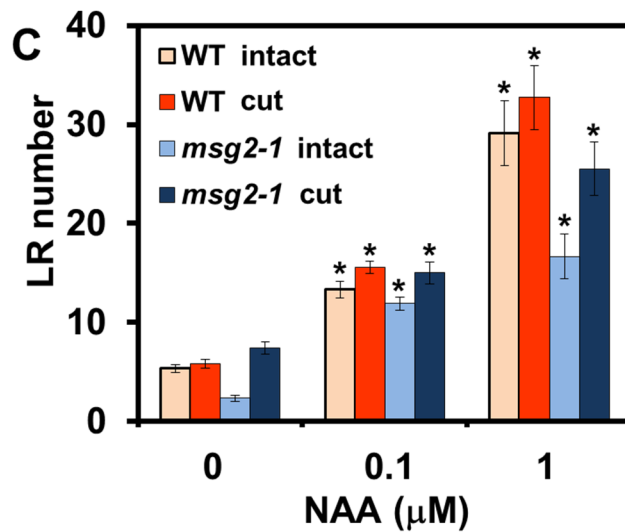

Supplementary Fig. S3. LR number of WT and *msg2-1* plants was induced by 1-naphthaleneacetic acid (NAA).

(A) Four-day-old plants were transferred to medium with or without NAA and incubated for 1 d before root cutting. Photographs were taken 4 d after root cutting. Scale bars = 1 cm. Red arrowheads indicate the point 12 mm from the root-shoot junction where the root was cut. (B) The number of LRs was counted within the 12 mm area from the root-shoot junction 4 d after root cutting. Error bars indicate the SE (n=20). \*Significant differences compared with plants in control medium (Student's *t* test,  $P < 0.05$ ).

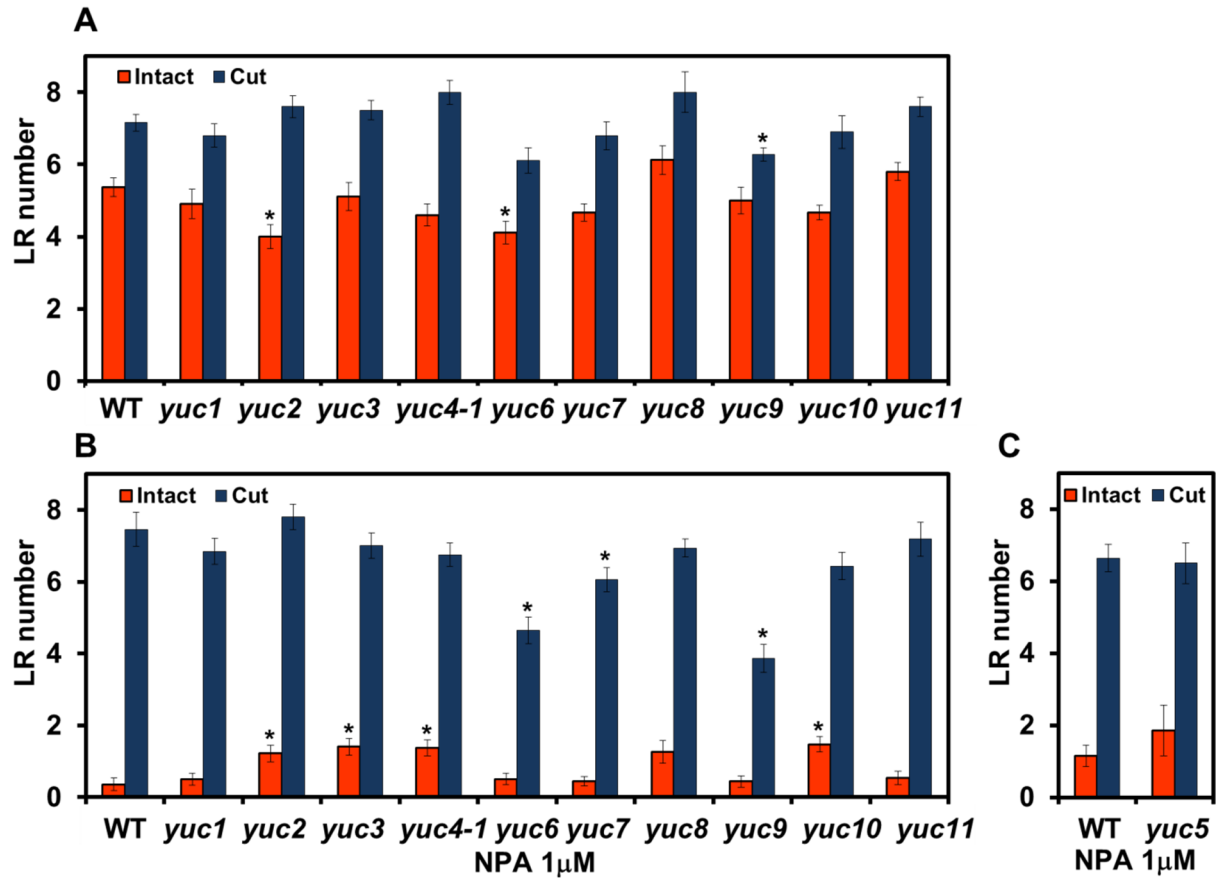

Supplementary Fig. S4. Analysis of root-cutting induced increase in LR number (RCN) in *yucca* (*yuc*) mutants.

Four-day-old plants were transferred to medium without (A) or with (B, C) N-1-naphthylphthalamic acid (NPA) and incubated for 1 d before root cutting. The number of LR was counted within the 12 mm area from the root-shoot junction 4 d after root cutting. Error bars indicate the SE (n=16). \*Significant differences compared with WT (Student's *t* test,  $P < 0.01$ ). (C) Plants were in Landsberg *erecta* background.

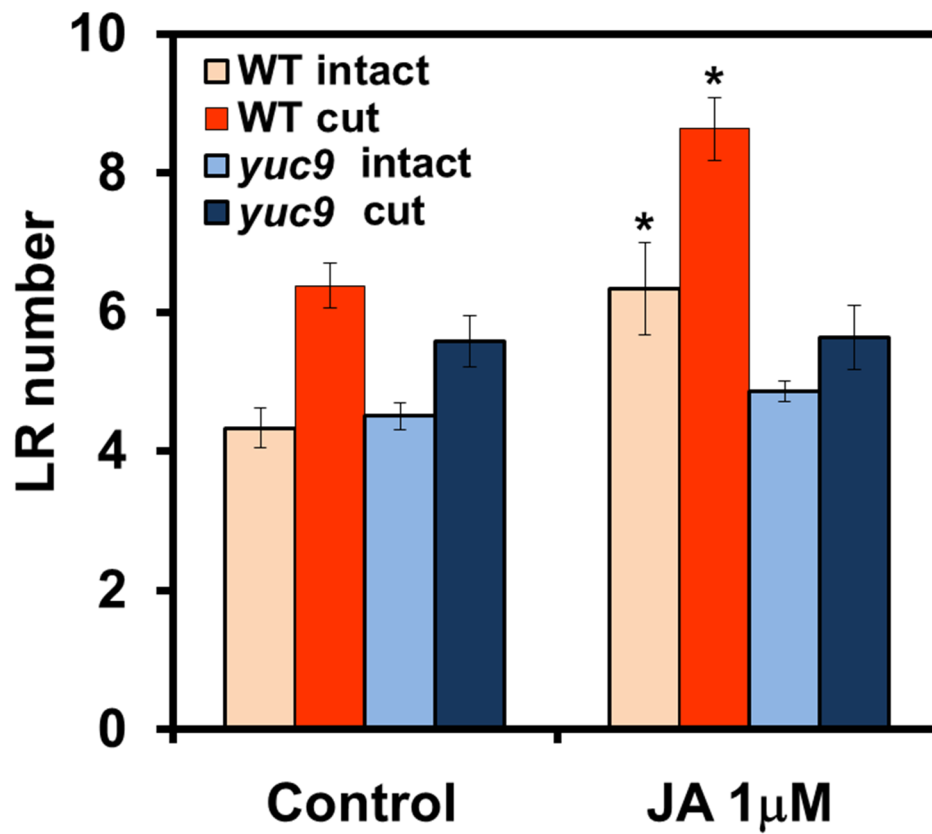

Supplementary Fig. S5. Jasmonic acid (JA) induced LR formation in WT but not in *yuc9*.

Four-day-old plants were transferred to medium with or without JA and incubated for 1 d before root cutting. The number of LRs was counted in the 12 mm area from the root-shoot junction 4 d after root cutting. Error bars indicate the SE (n=16). \*Significant differences compared with plants in control medium (Student's *t* test, *P*<0.05).

## References

Blacha, A.M. (2009) Investigating the role of regulatory genes in heterosis for superior growth and biomass production in *Arabidopsis thaliana*. *Ph.D. thesis*, University Potsdam, Potsdam.

Muto, H., Watahiki, M.K., Nakamoto, D., Kinjo, M. and Yamamoto, K.T. (2007) Specificity and similarity of functions of the *Aux/IAA* genes in auxin signaling of *Arabidopsis* revealed by promoter-exchange experiments among *MSG2/IAA19*, *AXR2/IAA7*, and *SLR/IAA14*. *Plant physiol.* 144: 187–196.
